# Supplementary material for: Online chemiluminescence determination of the hydroxyl radical using coumarin as a probe
Source: Royal Society of Chemistry journal article supplement (doi:10.1039/d3ay01476b), 2023-01-01
Supplement: d3ay01476b1.pdf [file d3ay01476b1.pdf]

## Electronic Supplementary Information

### Online chemiluminescence determination of hydroxyl radical using coumarin as probe

Pengyu Geng <sup>a,b</sup>, Jitao Lv <sup>\*a,b</sup>, Lixia Zhao <sup>a,b</sup>, Yawei Wang <sup>a,b</sup>

*<sup>a</sup>State Key Laboratory of Environmental Chemistry and Ecotoxicology, Research Center for Eco-Environmental Sciences, Chinese Academy of Sciences, Beijing 100085, China*

*<sup>b</sup>University of Chinese Academy of Sciences, Beijing 100049, China*

\*Corresponding author

Dr. Jitao Lv

Email: [jtlv@rcees.ac.cn](mailto:jtlv@rcees.ac.cn)

*Optimization of the concentrations of detection reagents.*

Solution contained 200  $\mu\text{M}$  COU, 100  $\mu\text{M}$   $\text{H}_2\text{O}_2$  and 5  $\mu\text{M}$   $\text{FeCl}_2$  were continuously stirred for 1h, then methanol (5%) were added to quench the reaction. This reaction solution was used as test solution to optimize the F-OCL detection conditions. Concentrations of NaOH from 0.5 to 3.0 mol  $\text{L}^{-1}$ ,  $\text{H}_2\text{O}_2$  from 0 to 0.8 mol  $\text{L}^{-1}$ , PMS from 0 to 0.4 mol  $\text{L}^{-1}$  were used to obtain optimized concentrations for F-OCL detection. The results were presented in Fig. S3.

*Production of  $\cdot\text{OH}$  by  $\text{TiO}_2$  photocatalysis.*

Commercial grade  $\text{TiO}_2$  (Aeroxide P25, 80% anatase and 20% rutile) was used in this study. A certain amount of P25 was added into glass beaker with 500 mL 200  $\mu\text{M}$  COU solution to prepare P25-COU suspension with  $\text{TiO}_2$  mass concentrations at 1, 10, 25 mg  $\text{L}^{-1}$ , respectively. The irradiation experiments were provided by a 300 W xenon lamp, and an AM 1.5 filter was used to best match the total solar spectrum. During photochemical experiment, the P25-COU suspension was put under the xenon lamp with distance about 15 cm and the suspension was constantly stirred. In-situ soil solution sampler was put into P25- COU suspension to collect analytical solution online by a peristaltic pump, and the solution was online detected by using flow oxidization CL method. On the other hand, 5 mL of suspension was collected at given time intervals, and 0.5 mL methanol was added to quench  $\cdot\text{OH}$ , then the suspension was centrifuged and filtered through pre-rinsed 0.22  $\mu\text{m}$  Nylon membranes. The filtered supernatants were analyzed by HPLC combined with fluorescence detection and F-OCL method.

*Verification of stability and repeatability of the F-OCL method.*

COU/ $\cdot$ OH reaction solution produced by TiO<sub>2</sub> photocatalysis was collected and kept at 4 °C in the dark. The CL signal of this solution was detected at different days to test the stability and repeatability of the method. The results were presented in Fig. S4.

*Effect of some coexistent substances on the detection of  $\cdot$ OH by F-OCL method.*

In order to study the possible matrix interference, some organic and inorganic substances with concentration of 1mM were mixed with COU (200  $\mu$ M) and detected using the optimized F-OCL method, e.g., FeCl<sub>3</sub>, FeCl<sub>2</sub>, MnCl<sub>2</sub>, CaCl<sub>2</sub>, KCl, NaCl, MgCl<sub>2</sub>, Na<sub>2</sub>SO<sub>4</sub>, NaNO<sub>3</sub>, citric acid (CA), oxalic acid (OA), glucose (Glu) and L-histidine(L-his), etc. The results were presented in Fig. S5.

*Detection of 7-hydroxycoumarin by high performance liquid chromatography.*

Coumarin and monohydroxy coumarins in samples were detected by HPLC combined with fluorescence detection (Agilent 1200). An Agilent SB-C18 Zorbax column (5  $\mu$ m, 4.6  $\times$  150 mm) was used for the separation. The mobile phase was methanol/water (V/V = 45/65) and the flow rate was 1 mL min<sup>-1</sup>. Fluorescence detector with excitation/emission wavelengths at 350/460 nm was used to detect 7OHC.<sup>1</sup> According to previous literatures, 6.1 % was of total  $\cdot$ OH radicals can be captured as 7OHC, therefore the total amount of  $\cdot$ OH was estimated as [7OHC]/6.1%.<sup>2, 3</sup>

**Table S1** Chemical characteristics of soil samples

| sample | pH   | TOC (%) | DOC (mg/kg) | Fe (g/kg) | Al (g/kg) | Mn (mg/kg) | Cation Exchange Capacity (cmol/kg) |
|--------|------|---------|-------------|-----------|-----------|------------|------------------------------------|
| soil1  | 4.45 | 0.37    | 48.52       | 26.53     | 29.44     | 422        | 14.6                               |
| soil2  | 4.74 | 0.54    | 89.55       | 68.91     | 63.06     | 218        | 13.0                               |
| soil3  | 4.82 | 1.11    | 153.35      | 58.17     | 46.37     | 175        | 20.3                               |
| soil4  | 7.86 | 2.13    | 155.01      | 25.10     | 23.55     | 328        | 27.8                               |

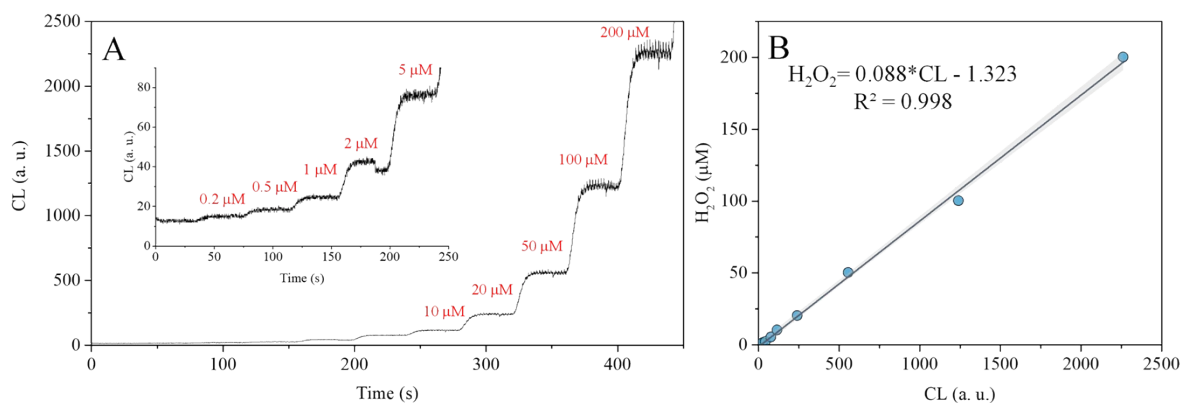

**Fig. S1** (A) Detected CL signals of  $\text{H}_2\text{O}_2$  with concentration ranges from 0 to 200  $\mu\text{M}$  by AE based CL analysis. (B) the relationship between CL signal and the concentration of  $\text{H}_2\text{O}_2$  ( $n = 3$ ).

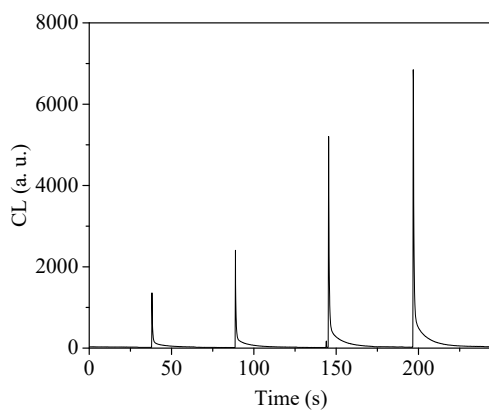

**Fig. S2** Chemiluminescence signal of COU/ $\cdot\text{OH}$  injected into PMS- $\text{H}_2\text{O}_2$ -NaOH mixed solution.

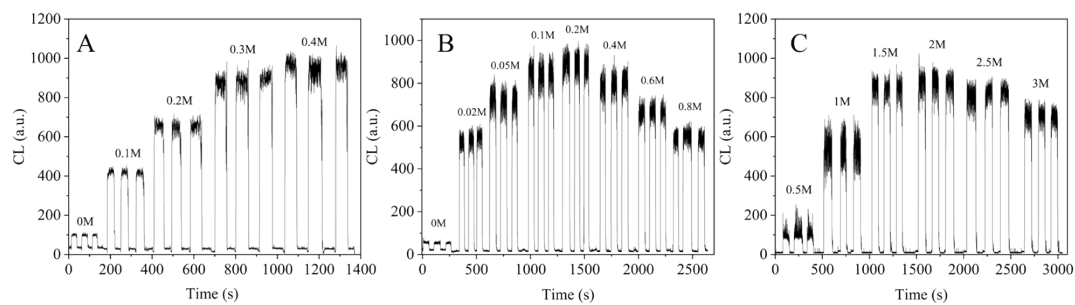

**Fig. S3** Optimization of the CL detection conditions, including (A) PMS concentrations, (B) the concentration of H<sub>2</sub>O<sub>2</sub>, (C) the concentration of NaOH.

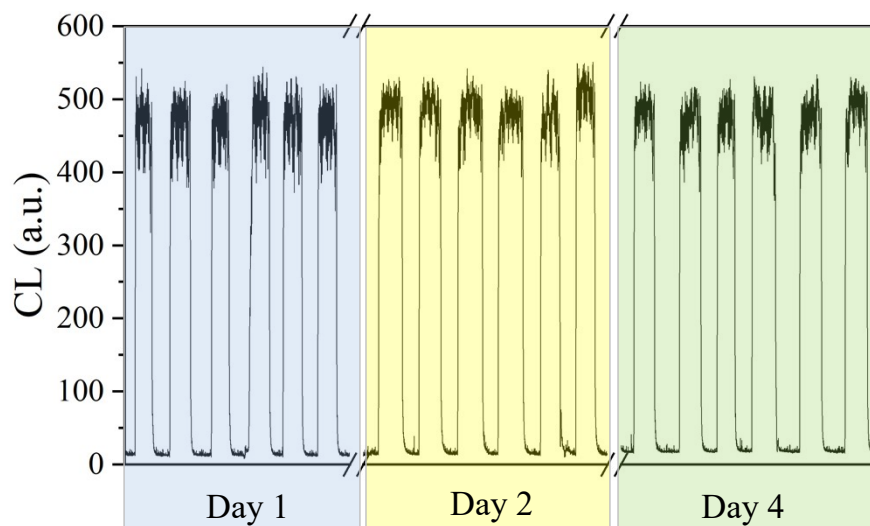

**Fig.S4** CL signals of the same solution at different days.

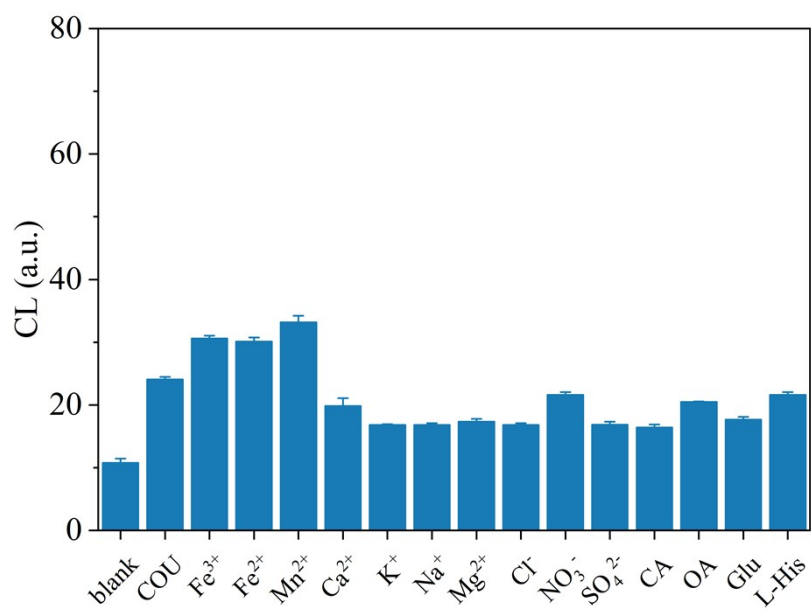

**Fig. S5** CL signals of mixture solution containing 1 mM coexistent substances and 200  $\mu$ M COU.

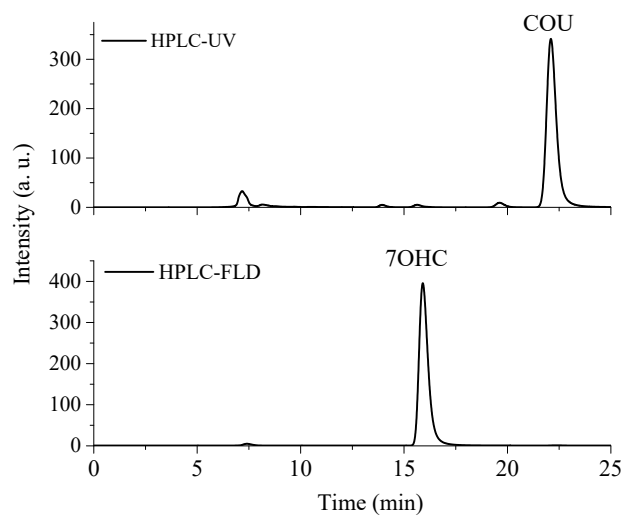

**Fig. S6** Typical spectrogram of HPLC analysis.

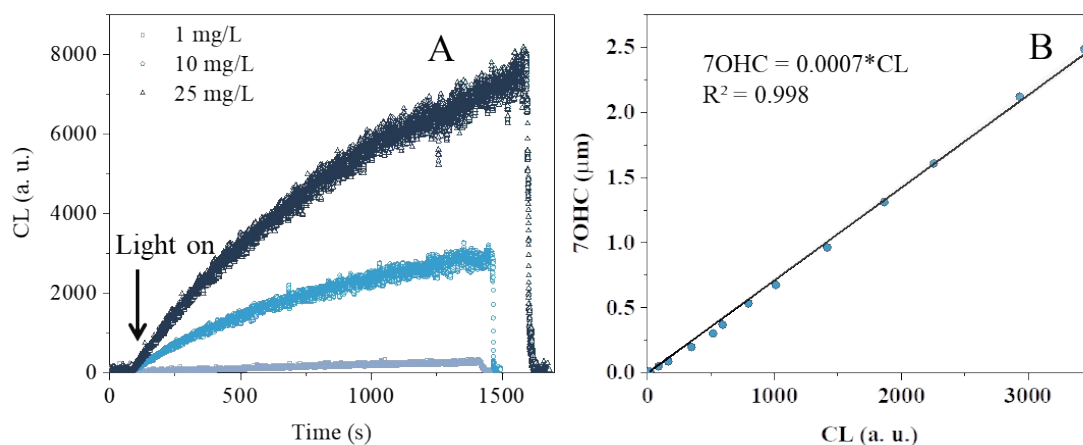

**Fig. S7 (A)** Dynamic changes of CL signal produced by the irradiation of TiO<sub>2</sub> suspensions (1, 10, 25 mg L<sup>-1</sup>) detected by oxidization CL system, (B) the relationship between CL signal and the production of 7OHC detected by HPLC combined with fluorescence detection (n = 3).

## References

- 1 G. Louit, S. Foley, J. Cabillic, H. Coffigny, F. Taran, A. Valleix, J. P. Renault and S. Pin, *Radiat. Phys. Chem.*, 2005, **72**, 119-124.
- 2 J. Zhang and Y. Nosaka, *J. Phys. Chem. C*, 2013, **117**, 1383-1391.
- 3 S. Nagarajan, N. C. Skillen, F. Fina, G. Zhang, C. Random, L. A. Lawton, J. T. S. Irvine and P. K. J. Robertson, *J. Photochem. Photobiol. A*, 2017, **334**, 13-19.
